# Supplementary material for: Exploring the anti-diabetic potential of bis-Schiff bases of ibuprofen: insights into the in vitro, molecular docking and density functional theory analyses
Source: Royal Society of Chemistry journal article supplement (doi:10.1039/d5ra03358f), 2026-02-25
Supplement: d5ra03358f1.xlsx [file d5ra03358f1.xlsx]

## Sheet: Sheet1
											Alpha Amylase
Conc.	4		5		6		7		8		9		10		11		12		13		14		15		Acar
1000	0.407	0.406	0.48	0.481	0.445	0.446	0.402	0.403	0.49	0.491	0.304	0.303	0.292	0.293	0.311	0.312	0.48	0.479	0.305	0.304	0.308	0.307	0.352	0.353	0.36	0.359
500	0.389	0.39	0.421	0.422	0.391	0.392	0.388	0.387	0.378	0.377	0.291	0.292	0.29	0.291	0.303	0.303	0.476	0.477	0.291	0.291	0.288	0.287	0.311	0.312	0.321	0.322
250	0.302	0.303	0.341	0.34	0.333	0.334	0.308	0.309	0.33	0.329	0.28	0.281	0.282	0.281	0.298	0.299	0.452	0.453	0.286	0.287	0.283	0.282	0.293	0.294	0.303	0.302
125	0.24	0.241	0.3	0.301	0.294	0.295	0.236	0.237	0.299	0.298	0.26	0.261	0.262	0.261	0.28	0.281	0.44	0.441	0.28	0.281	0.278	0.277	0.25	0.251	0.293	0.294
62.5	0.206	0.207	0.214	0.215	0.208	0.207	0.211	0.21	0.204	0.203	0.253	0.254	0.258	0.259	0.252	0.251	0.438	0.437	0.279	0.279	0.266	0.267	0.24	0.239	0.274	0.276
			IC50	IC50	SD
		4	89.29	87.25	1.4425
		5	92.43	91.45	0.692965
		6	78.45	78.41	0.0282843
		7	85.41	84.38	0.72832
		8	98.05	97.43	0.438406
		9	12.17	11.97	0.141421
		10	8.666	8.676	0.00707107
		11	14.47	14.68	0.148492
		12	5.515	5.584	0.0487904
		13	3.858	3.786	0.0509117
		14	7.205	6.945	0.183848
		15	32.69	32.93	0.169706
		Acarbose	16.77	16.36	0.289914

## Sheet: Sheet2
											Alpha Glucosidase
	Conc.	4		5		6		7		8		9		10		11		12		13		14		15		Acar
	1000	0.347	0.348	0.369	0.368	0.358	0.357	0.363	0.362	0.37	0.371	0.306	0.305	0.321	0.32	0.325	0.326	0.265	0.266	0.24	0.241	0.27	0.271	0.299	0.297	0.288	0.289
	500	0.3	0.301	0.319	0.32	0.333	0.334	0.33	0.329	0.34	0.341	0.277	0.279	0.317	0.318	0.322	0.322	0.255	0.256	0.238	0.237	0.254	0.253	0.276	0.277	0.281	0.282
	250	0.25	0.251	0.28	0.281	0.295	0.294	0.288	0.287	0.299	0.298	0.268	0.269	0.302	0.303	0.303	0.303	0.244	0.245	0.233	0.234	0.246	0.245	0.231	0.232	0.268	0.269
	125	0.198	0.199	0.204	0.205	0.212	0.213	0.204	0.203	0.202	0.203	0.255	0.256	0.298	0.298	0.291	0.292	0.24	0.241	0.225	0.226	0.24	0.239	0.22	0.219	0.265	0.264
	62.5	0.17	0.171	0.173	0.174	0.18	0.181	0.185	0.184	0.171	0.172	0.235	0.236	0.276	0.275	0.259	0.258	0.236	0.237	0.223	0.222	0.233	0.232	0.2	0.201	0.226	0.225
			IC50	IC50	SD
		4	91.52	89.46	1.45664
		5	96.93	94.67	1.59806
		6	82.07	80.95	0.79196
		7	87.42	86.62	0.565685
		8	101	100.1	0.636396
		9	16.6	16.43	0.120208
		10	9.515	9.651	0.0961665
		11	16.18	16.36	0.127279
		12	6.112	6.096	0.0113137
		13	4.368	4.539	0.120915
		14	8.12	8.318	0.140007
		15	34.22	33.75	0.33234
		Acarbose	16.14	16.55	0.289914
